# Supplementary material for: Sex specific emergence of trisomic Dyrk1a-related skeletal phenotypes in the development of a Down syndrome mouse model
Source: PubMed Central journal article supplement — bioRxiv. 2024 May 26:2024.05.24.595804. Preprint. [Version 1] doi: 10.1101/2024.05.24.595804 (PMC11142220; doi:10.1101/2024.05.24.595804), 2024-05-26

## Supplemental Tables

Supplemental Table 1. Average and standard error of the mean (SEM) of  $\mu$ CT parameters for temporal reduction of *Dyrk1a* copy number in maleTs65Dn mice at P30.

|                                               | <b>BMD</b>       | <b>BV/TV</b>     | <b>Tb.Th</b>        | <b>Tb.Sp</b>        | <b>Tb.N</b>     |                 |                        |                        |                  |
|-----------------------------------------------|------------------|------------------|---------------------|---------------------|-----------------|-----------------|------------------------|------------------------|------------------|
| <b><i>Euploid</i></b>                         | 0.203 ±<br>0.016 | 26.98 ±<br>3.03  | 0.069<br>±<br>0.004 | 0.166<br>±<br>0.010 | 3.83 ±<br>0.232 |                 |                        |                        |                  |
| <b><i>Eu,Dyrk1a<sup>+/+</sup>/dox-cre</i></b> | 0.211 ±<br>0.012 | 28.79 ±<br>2.23  | 0.063<br>±<br>0.002 | 0.142<br>±<br>0.005 | 4.53 ±<br>0.234 |                 |                        |                        |                  |
| <b><i>Ts65Dn</i></b>                          | 0.152 ±<br>0.010 | 18.27 ±<br>1.70  | 0.060<br>±<br>0.001 | 0.212<br>±<br>0.014 | 3.02 ±<br>0.242 |                 |                        |                        |                  |
| <b><i>Ts,Dyrk1a<sup>+/+</sup>/dox-cre</i></b> | 0.132 ±<br>0.013 | 14.73 ±<br>1.79  | 0.058<br>±<br>0.002 | 0.213<br>±<br>0.011 | 2.52 ±<br>0.272 |                 |                        |                        |                  |
|                                               | <b>Tt.Ar</b>     | <b>Ma.Ar</b>     | <b>Ct.Ar</b>        | <b>Ct.Th</b>        | <b>Ps.Pm</b>    | <b>Ec.Pm</b>    | <b>I<sub>max</sub></b> | <b>I<sub>min</sub></b> | <b>Ct.TMD</b>    |
| <b><i>Euploid</i></b>                         | 1.46 ±<br>0.075  | 0.812 ±<br>0.047 | 0.646<br>±<br>0.031 | 0.173<br>±<br>0.005 | 5.10 ±<br>0.122 | 3.90 ±<br>0.104 | 0.155 ±<br>0.016       | 0.092<br>±<br>0.009    | 1.02<br>0.007    |
| <b><i>Eu,Dyrk1a<sup>+/+</sup>/dox-cre</i></b> | 1.42 ±<br>0.033  | 0.801 ±<br>0.011 | 0.620<br>±<br>0.026 | 0.168<br>±<br>0.006 | 5.01 ±<br>0.057 | 3.86 ±<br>0.025 | 0.141 ±<br>0.009       | 0.086<br>±<br>0.005    | 1.04 ±<br>0.005  |
| <b><i>Ts65Dn</i></b>                          | 1.09 ±<br>0.039  | 0.636 ±<br>0.023 | 0.458<br>±<br>0.019 | 0.140<br>±<br>0.004 | 4.46 ±<br>0.078 | 3.45 ±<br>0.062 | 0.082 ±<br>0.007       | 0.050<br>±<br>0.003    | 0.980 ±<br>0.006 |
| <b><i>Ts,Dyrk1a<sup>+/+</sup>/dox-cre</i></b> | 1.08 ±<br>0.056  | 0.646 ±<br>0.015 | 0.440<br>±<br>0.042 | 0.134<br>±<br>0.011 | 4.44 ±<br>0.125 | 3.47 ±<br>0.047 | 0.076 ±<br>0.011       | 0.049<br>±<br>0.006    | 0.985 ±<br>0.012 |

Supplemental Table 2. Comparison of P30 vehicle (10%DMSO:90%PBS)-treated and untreated euploid and Ts65Dn mice. Data are average ± SEM.

|                                           | <b>BMD</b><br>(g/cm <sup>3</sup> ) | <b>BV/TV</b><br>(%) | <b>Tb.Th</b><br>(mm) | <b>Tb.Sp</b><br>(mm) | <b>Tb.N</b><br>(1/mm) | <b>Body Weight</b><br>(g) |
|-------------------------------------------|------------------------------------|---------------------|----------------------|----------------------|-----------------------|---------------------------|
| <b><i>P30 untreated euploid</i></b>       | 0.181 ±<br>0.012                   | 23.94<br>± 2.44     | 0.065<br>±<br>0.001  | 0.171<br>±<br>0.014  | 3.65 ±<br>0.320       | 19.63 ±<br>0.99           |
| <b><i>P30 vehicle-treated euploid</i></b> | 0.199 ±<br>0.010                   | 26.07<br>± 2.07     | 0.069<br>±<br>0.001  | 0.160<br>±<br>0.010  | 3.78 ±<br>0.274       | 18.58 ±<br>0.58           |

|                                                 |                                   |                                   |                                   |                       |                       |                       |                                             |                                             |                                      |
|-------------------------------------------------|-----------------------------------|-----------------------------------|-----------------------------------|-----------------------|-----------------------|-----------------------|---------------------------------------------|---------------------------------------------|--------------------------------------|
| <b>P30<br/>untreated<br/>Ts65Dn</b>             | 0.132 ±<br>0.013                  | 15.32<br>± 2.26                   | 0.062<br>±<br>0.002               | 0.245<br>±<br>0.022   | 2.36 ±<br>0.312       |                       | 12.74 ±<br>1.16                             |                                             |                                      |
| <b>P30<br/>vehicle-<br/>treated<br/>Ts65Dn</b>  | 0.181 ±<br>0.008                  | 23.05<br>± 1.41                   | 0.069<br>±<br>0.001               | 0.187<br>±<br>0.010   | 3.30 ±<br>0.183       |                       | 15.72 ±<br>0.77                             |                                             |                                      |
|                                                 | <b>Tt.Ar<br/>(mm<sup>2</sup>)</b> | <b>Ma.Ar<br/>(mm<sup>2</sup>)</b> | <b>Ct.Ar<br/>(mm<sup>2</sup>)</b> | <b>Ct.Th<br/>(mm)</b> | <b>Ps.Pm<br/>(mm)</b> | <b>Ec.Pm<br/>(mm)</b> | <b>I<sub>max</sub><br/>(mm<sup>4</sup>)</b> | <b>I<sub>min</sub><br/>(mm<sup>4</sup>)</b> | <b>Ct.TMD<br/>(g/cm<sup>3</sup>)</b> |
| <b>P30<br/>untreated<br/>euploid</b>            | 1.36 ±<br>0.053                   | 0.761<br>±<br>0.031               | 0.595<br>±<br>0.024               | 0.165<br>±<br>0.004   | 4.92 ±<br>0.094       | 3.76 ±<br>0.077       | 0.131 ±<br>0.011                            | 0.078<br>±<br>0.006                         | 1.01 ±<br>0.004                      |
| <b>P30<br/>vehicle-<br/>treated<br/>euploid</b> | 1.39 ±<br>0.040                   | 0.772<br>±<br>0.021               | 0.618<br>±<br>0.022               | 0.170<br>±<br>0.004   | 4.94 ±<br>0.064       | 3.78 ±<br>0.048       | 0.135 ±<br>0.008                            | 0.085<br>±<br>0.005                         | 1.01 ±<br>0.008                      |
| <b>P30<br/>untreated<br/>Ts65Dn</b>             | 1.06 ±<br>0.055                   | 0.618<br>±<br>0.025               | 0.442<br>±<br>0.032               | 0.136<br>±<br>0.007   | 4.37 ±<br>0.114       | 3.40 ±<br>0.071       | 0.079 ±<br>0.010                            | 0.060<br>±<br>0.005                         | 0.964 ±<br>0.012                     |
| <b>P30<br/>vehicle-<br/>treated<br/>Ts65Dn</b>  | 1.20 ±<br>0.049                   | 0.686<br>±<br>0.026               | 0.516<br>±<br>0.025               | 0.151<br>±<br>0.005   | 4.64 ±<br>0.096       | 3.57 ±<br>0.069       | 0.102 ±<br>0.009                            | 0.062<br>±<br>0.004                         | 0.974 ±<br>0.008                     |

## Supplemental Figures

Supplemental Figure 1. Cortical analysis of male Ts65Dn femurs from postnatal day (P)12-42. Remaining cortical parameters from  $\mu$ CT analysis. Data are mean  $\pm$  SEM. Significance determined through two-tail t-test with FDR adjustment. (\*) indicates  $p \leq 0.05$ , (\*\*) indicates  $p \leq 0.01$ .

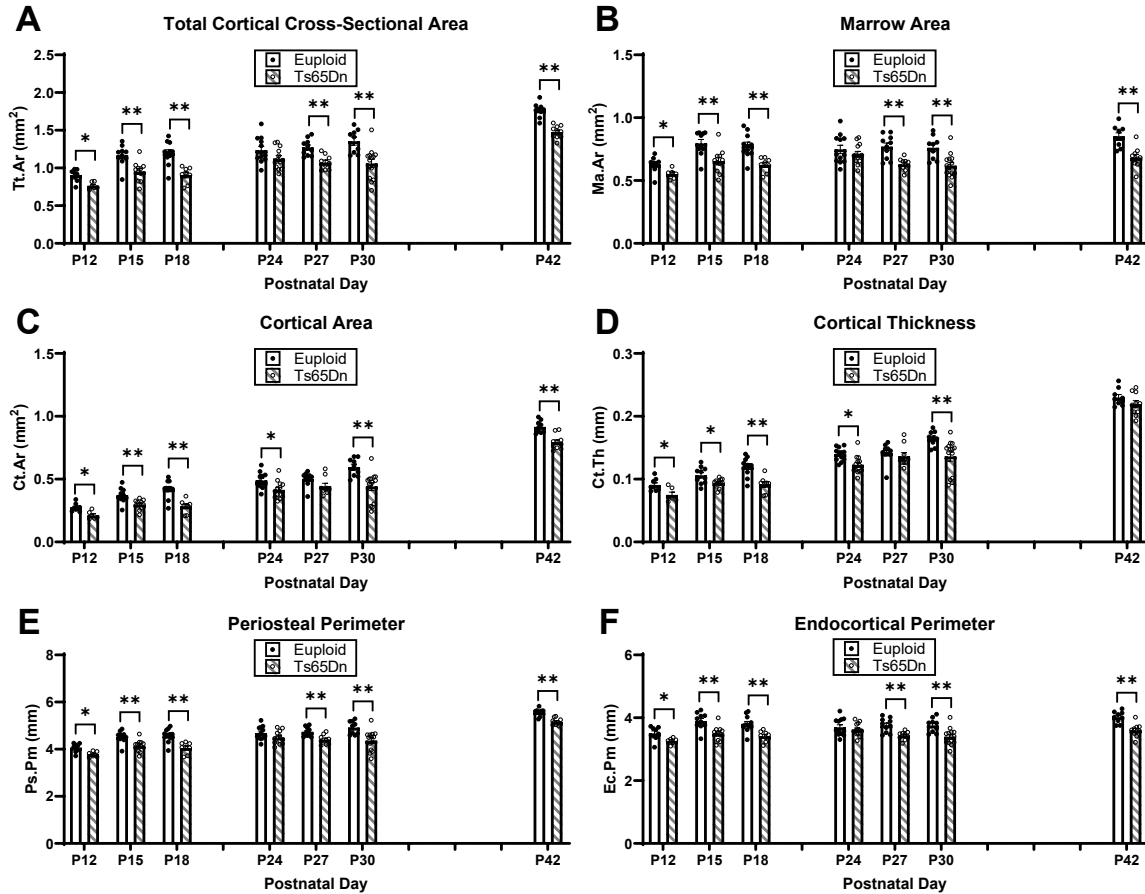

Supplemental Figure 2. Osteogenic gene expression at P24, P27, and P30

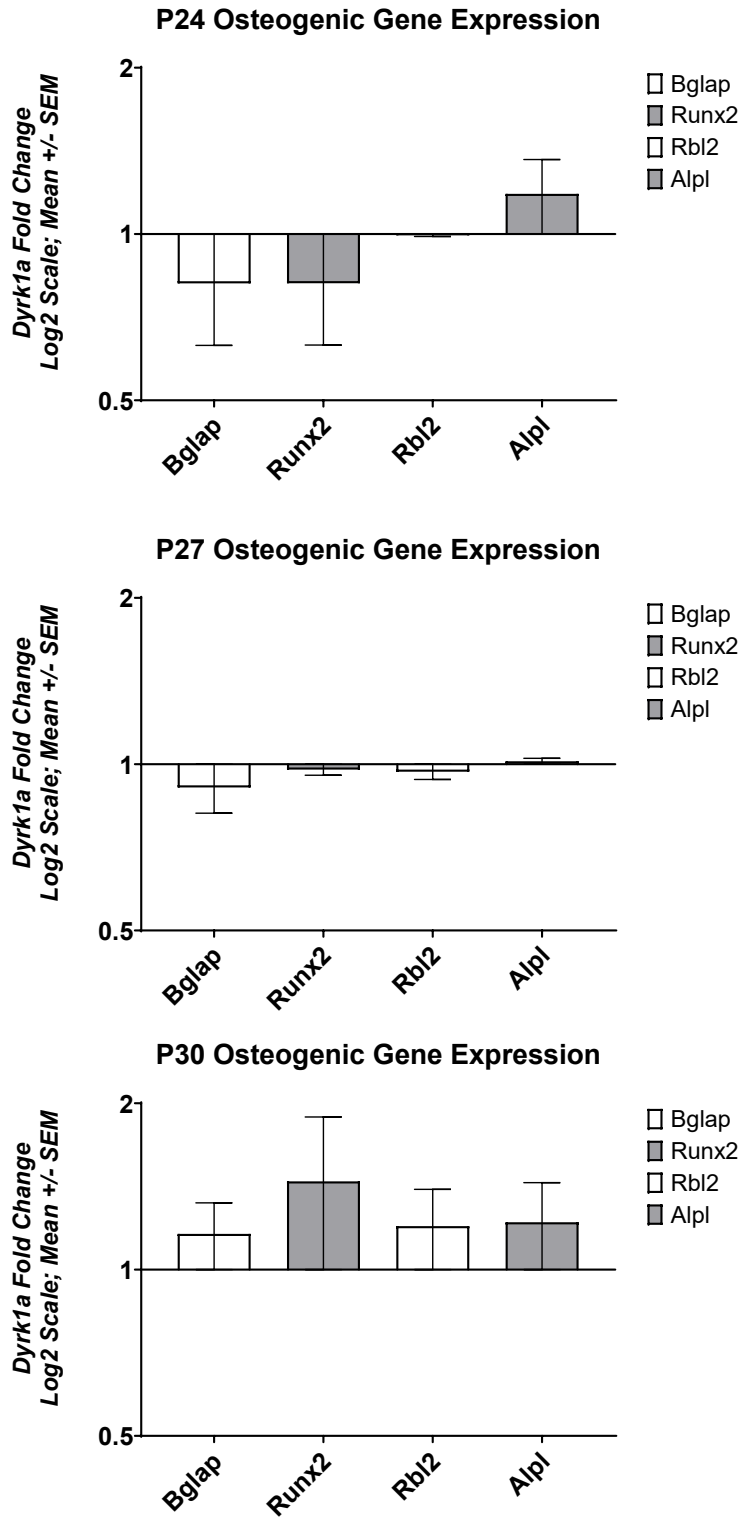

Supplement: NIHPP2024.05.24.595804v1-supplement-1.pdf [file NIHPP2024.05.24.595804v1-supplement-1.pdf]
